# Supplementary material for: Building the Framework for Standardized Clinical Laboratory Reporting of Next-generation Sequencing Data for Resistance-associated Mutations in Mycobacterium tuberculosis Complex
Source: PubMed Central journal article supplement (PMC6792097; doi:10.1093/cid/ciz219), 2019-03-18
Supplement: ciz219_suppl_supplementary_figure.pdf [file ciz219_suppl_supplementary_figure.pdf]

# MYCOBACTERIUM TUBERCULOSIS SEQUENCING REPORT

## Sample Details

|                       |                 |                           |                       |
|-----------------------|-----------------|---------------------------|-----------------------|
| Patient Name          | JOHN DOE        | Patient ID                | 12345678910           |
| Birth Date            | 2000-JAN-01     | Location                  | SOMEPLACE             |
| Sample Type           | SPUTUM          | Sample Collection Date    | 2016-DEC-25           |
| Sample Source         | PULMONARY       | Sequenced From            | CULTURED ISOLATE (LJ) |
| Sample ID             | A12345678       | Sample Received Date/Time | 2017-JAN-02, 12:22    |
| Laboratory Technician | TECHNICIAN NAME | Report Date/Time          | 2017-JAN-05, 11:45    |
| Requested By          | REQUESTER NAME  | Requester Contact         | REQUESTER@EMAIL.COM   |

## Assay Details

|           |                                                                                           |           |                         |
|-----------|-------------------------------------------------------------------------------------------|-----------|-------------------------|
| Sequencer | ILLUMINA HISEQ 2500                                                                       | Method    | WHOLE GENOME SEQUENCING |
| Pipeline  | RESEQTBV.3.2C ( <a href="https://platform.reseqtb.org">https://platform.reseqtb.org</a> ) | Reference | H37RV (NC_000962.3)     |

## Final Result

The sample was positive for *Mycobacterium tuberculosis*. It is resistant to isoniazid, rifampin, capreomycin, and kanamycin. It has intermediate resistance to ofloxacin and moxifloxacin. Expert consultation advised for pyrazinamide.

## Lineage

*Mycobacterium tuberculosis*, lineage 2.2.1 (East-Asian Beijing).

## Drug Susceptibility

Resistance is reported when a resistance-conferring mutation is detected in: *embB*, *gidB*, *gyrA*, *gyrB*, *inhA*, *katG*, *mshA*, *pncA*, *rpoB*, *rpsL*, *rrs*, or *tlyA*.<sup>1</sup> **No mutation detected does not exclude the possibility of resistance.**

- No mutations detected
- Multi-drug resistance predicted
- Extensive drug resistance predicted**

## Resistance Predictions for First Line TB Drugs

| Interpretation              | Drug         | Gene Target (Codon Change, Amino Acid Change, Allele %) | Confidence in Resistance Association | Comments                                                                                                                                        |
|-----------------------------|--------------|---------------------------------------------------------|--------------------------------------|-------------------------------------------------------------------------------------------------------------------------------------------------|
| Resistant                   | Isoniazid    | <i>katG</i> (G944C, Ser315Thr, 100%)                    | High                                 |                                                                                                                                                 |
|                             |              | <i>inhA</i>                                             |                                      | No mutation detected                                                                                                                            |
|                             |              | <i>mshA</i>                                             |                                      | No mutation detected                                                                                                                            |
|                             | Rifampin     | <i>rpoB</i> (C1349T, Ser450Leu, 100%)                   | High                                 | Rifabutin resistance likely                                                                                                                     |
| Susceptible                 | Ethambutol   | <i>embB</i>                                             |                                      | No mutation detected                                                                                                                            |
| Expert Consultation Advised | Pyrazinamide | <i>pncA</i> (T416C, Val139Ala, 98%)                     | Minimal                              | Mutation known to disrupt enzymatic activity and functional genetics in vitro. Insufficient data to determine clinical impact of this mutation. |

# MYCOBACTERIUM TUBERCULOSIS SEQUENCING REPORT

## Sample Details

|                       |                 |                           |                       |
|-----------------------|-----------------|---------------------------|-----------------------|
| Patient Name          | JOHN DOE        | Patient ID                | 12345678910           |
| Birth Date            | 2000-JAN-01     | Location                  | SOMEPLACE             |
| Sample Type           | SPUTUM          | Sample Collection Date    | 2016-DEC-25           |
| Sample Source         | PULMONARY       | Sequenced From            | CULTURED ISOLATE (LJ) |
| Sample ID             | A12345678       | Sample Received Date/Time | 2017-JAN-02, 12:22    |
| Laboratory Technician | TECHNICIAN NAME | Report Date/Time          | 2017-JAN-05, 11:45    |
| Requested By          | REQUESTER NAME  | Requester Contact         | REQUESTER@EMAIL.COM   |

## Resistance Predictions for Second Line TB Drugs

| Interpretation | Drug         | Gene Target (Codon Change, Amino Acid Change, Allele %) | Confidence in Resistance Association                                                                                                                                                                            | Comments                                                                                                                                                                                                    |
|----------------|--------------|---------------------------------------------------------|-----------------------------------------------------------------------------------------------------------------------------------------------------------------------------------------------------------------|-------------------------------------------------------------------------------------------------------------------------------------------------------------------------------------------------------------|
| Resistant      | Capreomycin  | <i>rrs</i> (C1402T, NA, 97%)                            | High                                                                                                                                                                                                            | 100% of isolates with this mutation were capreomycin resistant in the ReSeqTB database.                                                                                                                     |
|                |              | <i>tlyA</i>                                             |                                                                                                                                                                                                                 | No mutation detected                                                                                                                                                                                        |
| Intermediate   | Ofloxacin    | <i>gyrA</i> (C269T, Ala90Val, 14%)                      | High                                                                                                                                                                                                            | Ofloxacin and levofloxacin resistance predicted. At least low-level resistance predicted ( $\geq 0.5 \mu\text{g/mL}$ in MGIT Culture)                                                                       |
|                |              | <i>gyrB</i>                                             |                                                                                                                                                                                                                 | No mutation detected                                                                                                                                                                                        |
|                | Moxifloxacin | <i>gyrA</i> (C269T, Ala90Val, 14%)                      | High                                                                                                                                                                                                            | At least low-level resistance predicted ( $\geq 0.5 \mu\text{g/mL}$ in MGIT Culture)                                                                                                                        |
|                |              | <i>gyrB</i>                                             |                                                                                                                                                                                                                 | No mutation detected                                                                                                                                                                                        |
| Susceptible    | Amikacin     | <i>rrs</i>                                              |                                                                                                                                                                                                                 | The C1402T mutation is associated with resistance to other injectable drugs including kanamycin and capreomycin. This mutation has not been associated with resistance to amikacin in the ReSeqTB database. |
|                | Ethionamide  | <i>inhA</i>                                             |                                                                                                                                                                                                                 | No mutation detected                                                                                                                                                                                        |
|                |              | <i>gidB</i>                                             |                                                                                                                                                                                                                 | No mutation detected                                                                                                                                                                                        |
|                |              | <i>rpsL</i>                                             |                                                                                                                                                                                                                 | No mutation detected                                                                                                                                                                                        |
| Streptomycin   | <i>rrs</i>   |                                                         | The C1402T mutation is associated with resistance to other injectable drugs including kanamycin and capreomycin. This mutation has not been associated with resistance to streptomycin in the ReSeqTB database. |                                                                                                                                                                                                             |

# MYCOBACTERIUM TUBERCULOSIS SEQUENCING REPORT

## Sample Details

|                       |                 |                           |                       |
|-----------------------|-----------------|---------------------------|-----------------------|
| Patient Name          | JOHN DOE        | Patient ID                | 12345678910           |
| Birth Date            | 2000-JAN-01     | Location                  | SOMEPLACE             |
| Sample Type           | SPUTUM          | Sample Collection Date    | 2016-DEC-25           |
| Sample Source         | PULMONARY       | Sequenced From            | CULTURED ISOLATE (LJ) |
| Sample ID             | A12345678       | Sample Received Date/Time | 2017-JAN-02, 12:22    |
| Laboratory Technician | TECHNICIAN NAME | Report Date/Time          | 2017-JAN-05, 11:45    |
| Requested By          | REQUESTER NAME  | Requester Contact         | REQUESTER@EMAIL.COM   |

## Resistance Predictions for Other TB Drugs

| Interpretation                              | Drug        | Gene Target (Codon Change, Amino Acid Change, Allele %) | Confidence in Resistance Association | Comments                                                                                                                                 |                                                                                  |
|---------------------------------------------|-------------|---------------------------------------------------------|--------------------------------------|------------------------------------------------------------------------------------------------------------------------------------------|----------------------------------------------------------------------------------|
| Insufficient Data for Resistance Prediction | Bedaquiline | <i>atpE</i>                                             |                                      | No mutation detected                                                                                                                     |                                                                                  |
|                                             |             | <i>mmpR</i> (G198Insertion, Frameshift, 98%)            | Insufficient Data                    | Insertion of duplicate G: CGGGGGGG<br>Gene target has shown <i>in vitro</i> resistance to bedaquiline and clofazimine in the literature. |                                                                                  |
|                                             | Clofazimine | <i>mmpR</i> (G198Insertion, Frameshift, 98%)            | Insufficient Data                    | Insertion of duplicate G: CGGGGGGG<br>Gene target has shown <i>in vitro</i> resistance to bedaquiline and clofazimine in the literature. |                                                                                  |
|                                             | Delamanid   |                                                         | <i>ddn</i>                           |                                                                                                                                          | No mutation detected                                                             |
|                                             |             |                                                         | <i>fbiA</i>                          |                                                                                                                                          | No mutation detected                                                             |
|                                             |             |                                                         | <i>fbiB</i>                          |                                                                                                                                          | No mutation detected                                                             |
|                                             |             |                                                         | <i>fbiC</i>                          |                                                                                                                                          | No mutation detected                                                             |
|                                             |             |                                                         | <i>fgd1</i>                          |                                                                                                                                          | No mutation detected                                                             |
|                                             | Linezolid   |                                                         | <i>rplC</i> (T460C, Cys154Arg, 97%)  | Insufficient Data                                                                                                                        | Gene target has shown <i>in vitro</i> resistance to linezolid in the literature. |
|                                             |             |                                                         | <i>rrl</i>                           |                                                                                                                                          | No mutation detected                                                             |

# MYCOBACTERIUM TUBERCULOSIS SEQUENCING REPORT

## Sample Details

|                       |                 |                           |                       |
|-----------------------|-----------------|---------------------------|-----------------------|
| Patient Name          | JOHN DOE        | Patient ID                | 12345678910           |
| Birth Date            | 2000-JAN-01     | Location                  | SOMEPLACE             |
| Sample Type           | SPUTUM          | Sample Collection Date    | 2016-DEC-25           |
| Sample Source         | PULMONARY       | Sequenced From            | CULTURED ISOLATE (LJ) |
| Sample ID             | A12345678       | Sample Received Date/Time | 2017-JAN-02, 12:22    |
| Laboratory Technician | TECHNICIAN NAME | Report Date/Time          | 2017-JAN-05, 11:45    |
| Requested By          | REQUESTER NAME  | Requester Contact         | REQUESTER@EMAIL.COM   |

## Depth and Coverage Details

| Locus of Interest <sup>1</sup> | # Reads Mapped<br>(Depth of Coverage) | Proportion Covered<br>(Coverage Width %) | Mutation Frequency<br>(% Alternate Allele) |
|--------------------------------|---------------------------------------|------------------------------------------|--------------------------------------------|
| <i>atpE</i>                    | 79                                    | 100                                      | -                                          |
| <i>ddn</i>                     | 97                                    | 99.9                                     | -                                          |
| <i>embB</i>                    | 88                                    | 98.8                                     | -                                          |
| <i>fbiA</i>                    | 87                                    | 100                                      | -                                          |
| <i>fbiB</i>                    | 91                                    | 100                                      | -                                          |
| <i>fbiC</i>                    | 75                                    | 100                                      | -                                          |
| <i>fgd1</i>                    | 88                                    | 100                                      | -                                          |
| <i>gyrA</i>                    | 73                                    | 100                                      | Ala90Val (13.6%*)                          |
| <i>gyrB</i>                    | 76                                    | 100                                      | -                                          |
| <i>inhA</i>                    | 91                                    | 100                                      | -                                          |
| <i>katG</i>                    | 90                                    | 99.9                                     | Ser315Thr (100%)                           |
| <i>mmpR</i>                    | 62                                    | 100                                      | G193Insertion (98.4%)                      |
| <i>pncA</i>                    | 62                                    | 100                                      | Val139Ala (98.4%)                          |
| <i>rplC</i>                    | 78                                    | 99.9                                     | Cys154Arg (97.4%)                          |
| <i>rpoB</i>                    | 83                                    | 100                                      | Ser450Leu (100%)                           |
| <i>rrl</i>                     | 82                                    | 100                                      | -                                          |
| <i>rrs</i>                     | 59                                    | 99.9                                     | C1402I (96.6%)                             |
| <i>tlyA</i>                    | 58                                    | 98.5                                     | -                                          |

\*Hetero-resistance is defined in this report as a proportion of reads for a given allele between 10% and 90%.

<sup>1</sup>Loci of interest derived from ReSeqTB Data Platform and from Miotto P, et al. Eur Respir J. 2017 PMID: 29284687

## Disclaimer

Low frequency hetero-resistance below the limit of detection by sequencing may affect typing results. The interpretation provided is based on the current understanding of genotype-phenotype relationships. All results reference the *M. tuberculosis* mutation numbering system which differs from the *E. coli* numbering system. For *rpoB* add 81 to amino acid position to calculate the equivalent *E. coli* position. For *gyrB* subtract 7 amino acid positions to calculate the equivalent *E. coli* position.

Confidence is reported based on likelihood ratio value relating the mutation to resistance in the ReSeqTB database as follows:

**High** – LR ≥ 10, high confidence that the mutation confers or is associated with resistance

**Moderate** – LR ≥ 5 and <10, additional data desirable to improve evidence that the mutation confers or is associated with resistance

**Low** – LR ≥ 1 and < 5, inconclusive evidence that the mutation confers or is associated with resistance. Additional data required.

**Insufficient Data** – LR < 1, No evidence of association between mutation and resistance

## Authorized By

|                      |                 |             |                  |
|----------------------|-----------------|-------------|------------------|
| Name                 | AUTHORIZER NAME | Position    | LAB SUPERVISOR   |
| Signature            |                 | Date        | 2017-JAN-05      |
| Reporting Laboratory | LAB NAME        | LAB ADDRESS | LAB PHONE NUMBER |
